RESEARCH ARTICLE

# Transient Loss of Protection Afforded by a Live Attenuated Non-typhoidal *Salmonella* Vaccine in Mice Co-infected with Malaria

Jason P. Mooney<sup>1</sup>✉, Seung-Joo Lee<sup>2</sup>✉, Kristen L. Lokken<sup>1</sup>, Minelva R. Nanton<sup>2</sup>, Sean-Paul Nuccio<sup>1</sup>, Stephen J. McSorley<sup>2</sup>‡, Renée M. Tsolis<sup>1</sup>‡\*

**1** Department of Microbiology & Immunology, School of Medicine, University of California Davis, Davis, California, United States of America, **2** Center for Comparative Medicine, Department of Anatomy, Physiology and Cell Biology, School of Veterinary Medicine, University of California Davis, Davis, California, United States of America

✉ These authors contributed equally to this work.

‡ These authors also contributed equally to this work.

\* [rmtsolis@ucdavis.edu](mailto:rmtsolis@ucdavis.edu)

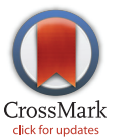

**OPEN ACCESS**

**Citation:** Mooney JP, Lee S-J, Lokken KL, Nanton MR, Nuccio S-P, McSorley SJ, et al. (2015) Transient Loss of Protection Afforded by a Live Attenuated Non-typhoidal *Salmonella* Vaccine in Mice Co-infected with Malaria. *PLoS Negl Trop Dis* 9(9): e0004027. doi:10.1371/journal.pntd.0004027

**Editor:** Edward T. Ryan, Massachusetts General Hospital, UNITED STATES

**Received:** May 22, 2015

**Accepted:** August 3, 2015

**Published:** September 14, 2015

**Copyright:** © 2015 Mooney et al. This is an open access article distributed under the terms of the [Creative Commons Attribution License](http://creativecommons.org/licenses/by/4.0/), which permits unrestricted use, distribution, and reproduction in any medium, provided the original author and source are credited.

**Data Availability Statement:** All relevant data are within the paper and its Supporting Information files.

**Funding:** This work was funded by US Public Health Service <http://www.usphs.gov/> (RMT, SJM); and American Heart Association <http://www.heart.org> (KLL). The funders had no role in study design, data collection and analysis, decision to publish, or preparation of the manuscript.

**Competing Interests:** The authors have declared that no competing interests exist.

## Abstract

In immunocompetent individuals, non-typhoidal *Salmonella* serovars (NTS) are associated with gastroenteritis, however, there is currently an epidemic of NTS bloodstream infections in sub-Saharan Africa. *Plasmodium falciparum* malaria is an important risk factor for invasive NTS bloodstream in African children. Here we investigated whether a live, attenuated *Salmonella* vaccine could be protective in mice, in the setting of concurrent malaria. Surprisingly, mice acutely infected with the nonlethal malaria parasite *Plasmodium yoelii* 17XNL exhibited a profound loss of protective immunity to NTS, but vaccine-mediated protection was restored after resolution of malaria. Absence of protective immunity during acute malaria correlated with maintenance of antibodies to NTS, but a marked reduction in effector capability of *Salmonella*-specific CD4 and CD8 T cells. Further, increased expression of the inhibitory molecule PD1 was identified on memory CD4 T cells induced by vaccination. Blockade of IL-10 restored protection against *S. Typhimurium*, without restoring CD4 T cell effector function. Simultaneous blockade of CTLA-4, LAG3, and PDL1 restored IFN- $\gamma$  production by vaccine-induced memory CD4 T cells but was not sufficient to restore protection. Together, these data demonstrate that malaria parasite infection induces a temporary loss of an established adaptive immune response via multiple mechanisms, and suggest that in the setting of acute malaria, protection against NTS mediated by live vaccines may be interrupted.

## Author Summary

In children, malaria is a predisposing factor for invasive bacterial infections with non-typhoidal *Salmonella* (NTS) serovars, a frequent cause of morbidity and mortality in sub-Saharan Africa. Since development of vaccines against NTS has been proposed as a

strategy to protect African children against disseminated NTS infection, we interrogated the effect of malaria on vaccine-induced memory responses to NTS. Our results from a mouse infection model show that infection with malaria parasites temporarily suspends protective immunity conferred by a live, attenuated vaccine and suppresses adaptive immune responses to NTS that are mediated by T cells. These results suggest that in the setting of acute malaria, live attenuated NTS vaccines may lose their effectiveness.

## Introduction

In immunocompetent individuals, non-typhoidal *Salmonella* serovars (NTS) cause gastroenteritis, a localized enteric infection characterized by intestinal neutrophil recruitment and diarrhea [1]. NTS gastroenteritis is the single most common cause of death from diarrheal disease associated with viruses, parasites or bacteria in the US [2] and high profile outbreaks provide a good visibility of this public health problem. Recently it has become more widely recognized that NTS infections have an enormous impact in developing countries, particularly in Sub-Saharan Africa. NTS are an important cause of gastroenteritis in Sub-Saharan Africa [3]. However, in addition these pathogens are often the most common cause of bloodstream infections, with *Salmonella enterica* serovars Enteritidis and Typhimurium (*S. Enteritidis* and *S. Typhimurium*) accounting for the majority of cases [4–8]. This syndrome, known as NTS bacteremia, is not a diarrheal disease, as symptoms of gastroenteritis are commonly absent [9]. Development of NTS bacteremia in African children is clinically associated with young age as well as with underlying conditions, including *Plasmodium falciparum* malaria, malnutrition, acquired immunodeficiency syndrome (AIDS) and anemia [9]. Of particular concern for treatment is the prevalence in this region of a novel genotype of *S. Typhimurium*, ST313, that is resistant to multiple antibiotics [10,11].

Currently there is strong interest in development of vaccines to prevent disseminated NTS infection, and both glycoconjugates and live, attenuated vaccines are currently in preclinical testing [9,12]. However, it is poorly understood how comorbidities such as malaria might impact protection afforded by such vaccines. To address this question, we used murine models to investigate whether existing immunity against disseminated infection conferred by a live, attenuated *S. Typhimurium* vaccine remains effective in the setting of malaria parasite infection.

## Materials and Methods

### Ethics statement

Experiments with mice were carried out in strict accordance with the recommendations in the Guide for Care and Use of Laboratory Animals of the National Institute of Health and were approved by the Institutional Animal Care and Use Committees at the University of California at Davis under protocols 16597, 16612, 16932 and 18183.

### Mouse strains

Specific pathogen free (SPF) 6–8 week-old female C57BL/6J and CBA/J mice were purchased from the Jackson Laboratory (Bar Harbor, Maine) or C57BL/6NCr were purchased from the National Cancer Institute (Frederick, MD). Mice were housed under SPF conditions by the UC Davis Center for Laboratory Animal Science; receiving irradiated rodent chow and sterile drinking water *ad libitum*. C57BL/6J-*Slc11a1*<sup>+/+</sup> (also known as *Nramp1*) mice were obtained

from Greg Barton at the University of California Berkeley, rederived by the UC Davis Mouse Biology Program and backcrossed to C57BL/6J under barrier conditions by the UC Davis Institute for Regenerative Cures. C57BL/6J-*Slc11a1*<sup>+/+</sup> genotypes from tail biopsies were determined using real time PCR with specific probes designed for the gene *Slc11a1* (Transnetyx, Cordova, TN).

### *Plasmodium yoelii* 17XNL

(*P. yoelii*) Parasites were kindly provided by Ana Rodriguez and Shirley Luckhart. Parasite stocks were made by passage in CD-1 mice, and harvested when mice had 5–10% parasitemia. For co-infection experiments, mice were inoculated i.p. on day 0 with approximately  $4 \times 10^7$  infected red blood cells (iRBCs) in 0.1 ml of saline. Mock-infected controls were injected i.p. with an equivalent amount of blood from uninfected CD-1 mice.

### Bacterial strains

*Salmonella enterica* serovar Typhimurium (*S. Typhimurium*) BRD509 strain [13] was kindly provided by Dr. D. Xu, University of Glasgow, Glasgow, U.K. To generate the *S. Typhimurium* BRD509 strain expressing the 2W1S epitope (EAWGALANWAVDSA) (strain SPN555), P22 generalized transduction [14,15] was performed using as a donor an *S. Typhimurium* SL1344 strain expressing 2W1S [16], which was a kind gift from Dr. M. Jenkins, University of Minnesota, Minneapolis, MN. *Salmonella* were cultured overnight in Luria-Bertani (LB) broth (Difco, BD Diagnostics, Sparks, MD) and diluted in PBS after estimation of bacterial concentration using a spectrophotometer. For vaccination,  $5 \times 10^5$  colony-forming units (CFU) of BRD509 was administered i.v.. For tetramer-tracking experiments, C57BL/6 mice were vaccinated with  $5 \times 10^5$  CFU of BRD509-2W1S. For challenge, virulent *S. Typhimurium* strain SL1344 *phoN*::Kan<sup>R</sup> (strain SW1096, provided by Dr. S. Winter, University of Texas Southwestern Medical Center, Dallas TX) was administered in malaria-infected or control mice i.v. using 750–1000 CFU or administered in CBA/J mice via oral gavage using  $1 \times 10^8$  CFU one day after oral administration of 20mg streptomycin (Sigma) in 0.1mL water. Inoculates were cultured for 16 h aerobically at 37°C. In all experiments, the final bacterial dose administered was confirmed by plating onto LB agar plates.

### Microbial readouts of infection

Parasitemia was determined by counting the percentage of *P. yoelii* iRBCs on thin blood smears stained with Giemsa (Acros Organics, NJ). Whole blood was collected with heparinized syringes and complete blood counts were analyzed by the UC Davis Comparative Pathology Laboratory using the Drew Scientific 950 FS Hematological Analyzer. To determine the numbers of viable *Salmonella*, livers and spleens were homogenized in PBS using an Ultra Turrax T25 Basic mixer (IKA). Blood was collected from hearts with a heparinized needle, plasma was removed and incubated for 10min with 120μL of 1% Triton X-100 in PBS at room temperature. Homogenates were serially diluted and plated on LB agar plates containing 100mg/L kanamycin. After overnight growth at 37°C, CFU/gram of tissue was calculated.

### Cell processing

Spleens, mesenteric lymph nodes (MesLN), and peripheral lymph nodes (PLNs, inguinal, axillary, brachial) were crushed through nylon mesh. Red blood cells (RBCs) in spleen were lysed with ACK lysing buffer (Lonza, Walkersville, MD), and then washed with 2% FBS/PBS. Livers were perfused, crushed through a cell strainer (BD Biosciences, San Diego, CA), and

resuspended in 35% Percoll (Sigma-Aldrich, St. Louis, MO). After centrifugation, pelleted cells were treated with ACK lysing buffer, and then washed with 2% FBS/PBS.

### Tracking 2W1S-specific endogenous CD4 T cell response using class-II tetramer and analyzing cytokine production by specific CD4 T cells

Tracking *Salmonella* specific CD4 T cell response using MHC class II tetramers was performed as described previously [17]. Malaria-infected or control mice were injected i.v. with lysates of 10<sup>8</sup> CFU heat-killed *Salmonella*. Four hours later, spleens and livers were collected and processed into single cell suspensions. Cells were stained with PE-conjugated 2W1S:I-A<sup>b</sup> tetramer in the presence of Fc block (culture supernatant from the 2.4G2 hybridoma, 2% mouse serum, 2% rat serum) room temperature for one hour. After washing with 2% FBS/PBS, cells were strained with fluorochrome-conjugated antibodies specific for CD3, CD4, CD8, and CD44 (eBioscience, San Diego, CA). For intracellular cytokine staining, cells were surface stained, and then treated with Foxp3/Transcription Staining buffer set (eBioscience) according to the manufacturer’s recommendation. Permeabilized cells were stained with fluorochrome-conjugated antibodies specific for IFN-γ (eBioscience). Cells were then analyzed by flow cytometry using a BD LSR Fortessa (BD Biosciences). All data sets were analyzed using FlowJo software (Tree star, San Carlos, CA).

### Examining *Salmonella*-specific T cell response *ex vivo*

MultiscreenHTS ELISPOT plates (Millipore, Billerica, MA) were coated with purified anti-mouse IFN-γ (BD Biosciences). Total CD4 T cells from malaria-infected or control splenocytes were stained with PE-conjugated anti-mouse CD4 (eBioscience) and then purified using the EasySep Mouse PE Positive Selection kit (STEMCELL Technologies, Vancouver, Canada) according to the manufacturer’s protocol. Total CD8 T cells were isolated from unbound fraction of CD4-PE positive selection using the EasySep Mouse CD8 Enrichment kit (STEMCELL Technologies) according to the manufacturer’s guidance. The purity of CD4 T cells and CD8 T cells was measured by flow cytometry and was typically >80%. Enriched CD4 or CD8 T cells were added to plates in the presence of 8x10<sup>5</sup> irradiated naïve splenocytes. Cells were restimulated with 10μM peptides (Table 1) at 37°C overnight. For CD8 T cell peptides, epitopes in Sse proteins were discovered by generating T cell lines and scanning for reactivity with overlapping peptides as described previously [18]. Bound IFN-γ was detected by biotin-conjugated anti-mouse IFN-γ (BD Biosciences), followed by AP-conjugated streptavidin (BD Biosciences). Bound IFN-γ antibodies were visualized using One-step NBT-BCIP substrate (Thermo, Rockford, IL) and plates were analyzed using an AID iSpot Reader Spectrum (AID US, San Diego, CA). The number of IFN-γ producing cells was normalized to the total number of enriched CD4 or CD8 T cells as determined by flow cytometry.

**Table 1. Peptides used in this study.**

|     | Peptide           | Sequence        | Source                |
|-----|-------------------|-----------------|-----------------------|
| CD4 | Flagellin 427–441 | VQNRFNSAITNLGNT | McSorley SJ 2000 [19] |
|     | SseI 268–280      | LIYYTDFSNSSIA   | Lee SJ 2012 [18,19]   |
|     | SseJ 329–341      | CYYETADAFKVIM   | Lee SJ 2012 [18,19]   |
|     | 2W1S              | EAWGALANWAVDSA  | Rees W 1999 [20]      |
| CD8 | SseI 68–75        | VVSRFELL        | This study            |
|     | SseJ 273–281      | GGVNNVLVM       | This study            |
|     | SseB 54–62        | QAIANNKFI       | This study            |

doi:10.1371/journal.pntd.0004027.t001

## Salmonella-specific antibody responses

Blood was collected retro-orbitally from malaria-infected or control mice. Sera were prepared by centrifugation. High-protein binding plates (Corning, Tewksbury, MA) were coated overnight with heat-killed *Salmonella* diluted in 0.1M NaHCO<sub>3</sub>. After incubation in 10% FBS/PBS for one hour at 37°C, the plates were washed twice with PBS/0.05% Tween 20, and serum samples were added in serial dilutions in 10% FBS/PBS. After incubation for two hours at 37°C, the plates were washed four times before the addition of biotin-conjugated anti-mouse IgG2c antibody (BD Bioscience). After incubation for one hour at 37°C, the plates were washed six times and incubated for one hour at 37°C with HRP-conjugated streptavidin (Sigma-Aldrich). The plates were then washed eight times and an HRP substrate (*O*-phenylenediamine dihydrochloride, Sigma-Aldrich) was used to develop the plates. After sufficient color-change was observed, the reaction was stopped by adding 100μL 1M H<sub>2</sub>SO<sub>4</sub>. The plates were analyzed using a spectrophotometer (SpectraMax M2, Molecular Devices, Sunnyvale, CA).

## Antibody blockade of PDL-1/LAG3/CTLA-4 or IL-10

For the PDL-1/LAG3/CTLA-4-blocking experiment with *in vivo* stimulation at day 14, malaria-infected and control mice were treated i.p. with a 300μL cocktail containing 400 μg of anti-mouse PDL-1, 400 μg of anti-mouse LAG3 and 400 μg of anti-mouse CTLA-4, or isotype control antibodies (BioXcell, West Lebanon, NH) 7, 9, 11, and 13 days after malaria infection. For the experiment in which mice were challenged at day 14 after malaria infection, an additional injection of 260μg of antibody was given at day 15. For the IL-10 blocking experiment, a total of 600 μg of rat anti-mouse IL-10 immunoglobulin G1 (IgG1) kappa (eBioscience, San Diego, CA) or isotype control was given i.p. in the following manner; 300 μg on day 13, 200 μg on day 14, and 100 μg on day 15.

## RNA extraction, reverse transcription-PCR (RT-PCR), and real-time PCR

Animal tissues were frozen in liquid nitrogen at necropsy and stored at -80°C. RNA was extracted from tissue as described previously [21] using Tri-Reagent (Molecular Research Center) according to the instructions of the manufacturer. All RNA was treated with DNaseI (Ambion) to remove genomic DNA contamination. For a quantitative analysis of mRNA levels, 1μg of total RNA from each sample was reverse transcribed in a 50-μL volume, using reagents from Applied Biosystems, and 4 μL of cDNA was used for each real-time reaction. RT-PCR was performed using a ViiA 7 Real-Time PCR System (Applied Biosystems) and amplicons were detected via intercalation of SYBR green dye (Applied Biosystems). Data was analyzed by using the comparative threshold cycle (C<sub>T</sub>) method (Applied Biosystems). Target gene transcription of each sample was normalized to the respective levels of β-Actin mRNA and represented as fold change ( $2^{-\Delta\Delta C_T}$ ) over gene expression in control animals. Primers used in this study were the following: β-Actin forward (AGAGGGAAATCGTGCGTGAC) β-Actin reverse (CAATAGTGATGACCTGGCCGT), IFNγ forward (CAACAGCAAGGCGAAAAA GGATGC) IFNγ reverse (CCCCGAATCAGCAGCGACTCC), Il10 forward (GGTTGCCAA GCCTTATCGGA) Il10 reverse (ACCTGCTCCACTGCCTTGCT).

## Statistical analysis

The statistical significance of differences between groups was determined by a Student's *t* test on logarithmically transformed data. For data sets in which all values were the same (zero),

statistical significance was determined by a Mann-Whitney U test. A *P* value of 0.05 or less was considered to be significant. All data were analyzed using two-tailed tests.

## Results

### Transient loss in vaccine-mediated protection against *Salmonella* during acute malaria

In sub-Saharan Africa, current or recent malaria are associated with increased risk for invasive bacterial infections, including those with NTS [22]. While previous studies have shown that clinical malaria may impair development of protective immunity after vaccination [23], few studies have addressed whether acute malaria impacts existing acquired immunity. Therefore, to examine how current or recent malaria would effect existing vaccine mediated protection against *S. Typhimurium*, we made use of a mouse model in which protective immunity is induced in the absence of malaria, via administration of a well-characterized live attenuated NTS vaccine (strain BRD509,  $\Delta$ aroA  $\Delta$ aroD) [24–28]. We then interrogated the effect of malaria on established immunity to *S. Typhimurium*.

To interrogate effects of malaria on vaccine induced immunity to *S. Typhimurium*, C57BL/6 mice were immunized via the intravenous (i.v.) route with strain BRD509, as this route induces Th1-dependent immunity in the mouse [27]. After 6 weeks, vaccinated mice and sham-treated controls were inoculated with the non-lethal murine malaria parasite *Plasmodium yoelii* subspecies *yoelii* 17XNL (*P. yoelii*) by intraperitoneal (i.p.) injection of parasite-infected erythrocytes or an equal volume of uninfected murine red blood cells. Peak parasite burden, as determined by microscopy of thin blood smears, occurred at 12 days post *P. yoelii* inoculation, and resolution below the limit of detection occurred at 21 days (Fig 1A). *P. yoelii*-infected mice at 14 days post infection exhibited characteristic responses to malaria parasite infection including splenomegaly, anemia, and an increase in circulating lymphocytes (S1 Fig). These changes resolved by day 28, (Figs 1B and S1), when infectious blood-stage parasites could no longer be detected via transfer of whole blood to naïve mice (S1C Fig). Therefore, in subsequent experiments, we challenged *S. Typhimurium*-vaccinated mice around peak parasite infection, at day 14, and after the resolution of parasite infection, at day 28. Vaccinated or unvaccinated control mice were inoculated i.v. with 750–1000 colony forming units (CFU) of virulent SL1344 containing a selectable marker (SL1344 *phoN::Kan<sup>R</sup>*). Unvaccinated mice that were coinfecting with *S. Typhimurium* and *P. yoelii* exhibited marked morbidity after 3 days post *S. Typhimurium* challenge (data not shown) and therefore experiments were terminated at this time. In vaccinated mice challenged with *S. Typhimurium* in the absence of parasite infection, bacterial colonization of the liver decreased by nearly two orders of magnitude compared to unvaccinated controls (Fig 1C), and splenic colonization decreased by three orders of magnitude (S2A Fig). In contrast, vaccinated mice challenged with *S. Typhimurium* at day 14 of malaria parasite infection had significantly reduced protection, showing a 264-fold increase in bacterial burden in the liver compared to controls not infected with *P. yoelii* (Fig 1C) and a 31-fold increase in the spleen (S2A Fig). Interestingly, vaccine-mediated protection was restored in both liver (Fig 1C) and spleen (S2B Fig) when mice were challenged with *S. Typhimurium* after resolution of malaria parasite infection (at day 28 after malaria parasite infection). Loss of vaccine-mediated protection during malaria parasite infection was independent of *Slc11a1* (*Nramp1*) genotype and route of *S. Typhimurium* infection, as we observed the same effect in both C57BL/6 *Slc11a1*<sup>+/+</sup> mice with i.v. infection routes and in CBA mice with intragastric (i.g.) routes (Figs 1D, S2C and S3). Notably, while vaccination protected both *Slc11a1*<sup>+/+</sup> and *Slc11a1*<sup>-/-</sup> mice from bacteremia, this protection was lost in *P. yoelii*-infected

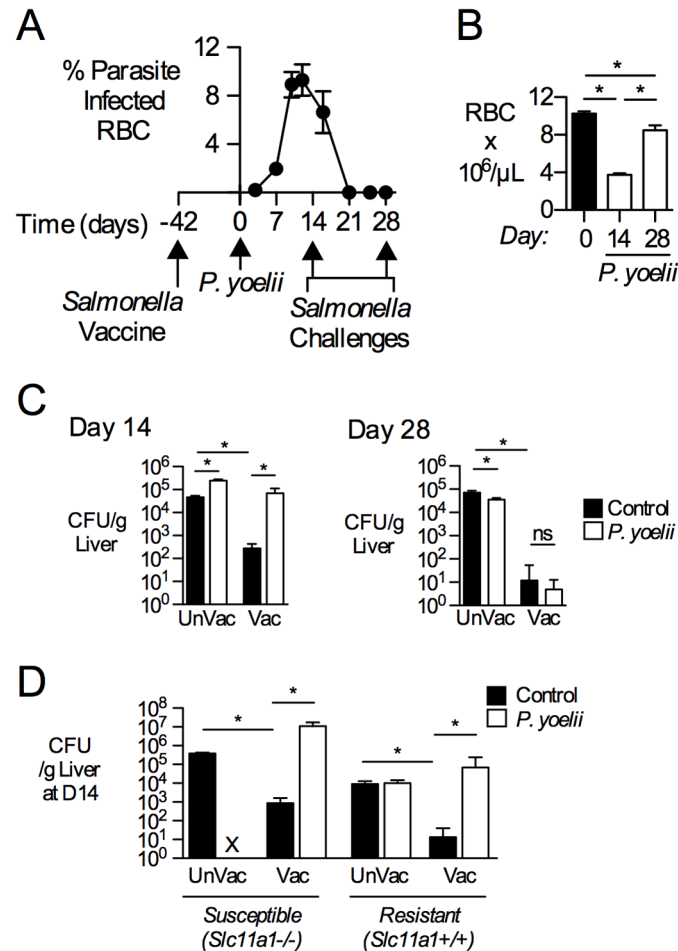

**Fig 1. Transient loss in protection to *Salmonella* challenge during peak malaria-parasite infection in *Salmonella*-vaccinated mice.** C57BL/6 mice were vaccinated i.v. with  $5 \times 10^5$  CFU attenuated *S. Typhimurium* BRD509 (Vac). Forty-two days later, a group of vaccinated mice was inoculated i.p. with blood containing  $4 \times 10^7$  *P. yoelii*-infected red blood cells (RBC) and the rest were given control blood. (A) Parasite burden, shown as % infected red blood cells (RBCs) ( $n = 25$ ). Data represent Mean $\pm$ SEM. (B) RBC concentrations ( $10^6/\mu\text{L}$ ) at either 14 or 28 days after malaria parasite inoculation as determined by complete blood counts ( $n = 4-8$ ). Bars represent the Mean $\pm$ SEM. (C) Mice were challenged with 750–1000 CFU of virulent *S. Typhimurium* via the i.v. route at either 14 days (C, left) or 28 days (C, right) after *P. yoelii* infection. At 3 d post-challenge, bacterial burden was determined in livers from mice infected with *S. Typhimurium* only (Control) or co-infected (*P. yoelii*). (D) C57BL/6 ( $n = 5$ ), which are *Nramp1/Slc11a1*<sup>-/-</sup>, or C57BL/6 expressing a functional allele of *Slc11a1* ( $n = 3-13$ ), were vaccinated, then inoculated with *P. yoelii* and challenged i.v. with virulent *S. Typhimurium* at 14 days after *P. yoelii* infection. *S. Typhimurium* burden was quantified in the liver at 3 days after challenge with virulent *S. Typhimurium*. X, not performed. Data represent Mean $\pm$ SEM ( $n = 4-8$ ). Significance of differences between groups was determined using a Student's *t* test (\*,  $p < 0.05$ ; ns, not significant).

doi:10.1371/journal.pntd.0004027.g001

mice (Fig 1D). Together, these data show that protection conferred by a live, attenuated *S. Typhimurium* vaccine is lost during acute malaria parasite infection.

### Levels of circulating antibodies are unchanged during malaria

Vaccination against *S. Typhimurium* elicits a robust B cell response, which is important for control of secondary infections [29]. The generation of *S. Typhimurium*-specific antibodies involves T cell-dependent isotype class switching to IgG2c [30]. Given the importance of this

switched antibody response in controlling the spread of secondary infection, we determined the effect of malaria parasite infection on vaccine-induced anti-*Salmonella* IgG2c titers. Circulating levels of IgG2c at 14 and 28 days after *P. yoelii* infection did not differ from non-infected mice (S4 Fig), suggesting that the observed loss of protection does not result from depletion of these *Salmonella*-specific antibodies during acute malaria. Consistent with presence of class-switched IgG2c, levels of *Salmonella*-specific IgM were low and were not strongly affected by *P. yoelii* infection (S4 Fig).

### IFN- $\gamma$ production by *Salmonella*-specific T cells is reduced during peak malaria

Adaptive immunity to *Salmonella* involves both CD4 and CD8 T cells and largely depends upon the production of IFN- $\gamma$  [31]. Therefore, we determined the effect of active malaria infection on the function of memory T cells specific for a variety of natural *S. Typhimurium* MHC Class II epitopes from the target antigens flagellin, SseI and SseJ. Splenic CD4 T cells were enriched by immunomagnetic separation from BRD509-vaccinated mice that were infected with *P. yoelii* or mock treated and then stimulated *ex vivo* with exogenous *S. Typhimurium* epitopes (Table 1) in an IFN- $\gamma$ -coated ELISPOT plate. In order to enumerate the number of IFN- $\gamma$  producing CD4 T cells per well, we used flow cytometry (Fig 2). After stimulation, we observed a marked decrease in the number of IFN- $\gamma$ -producing CD4 T cells responding to flagellin, SseI, and SseJ (Table 1) at day 14 but these responses had largely recovered after the resolution of parasite infection (day 28) (Fig 2A). *P. yoelii* infection alone did not affect numbers of IFN- $\gamma$ -producing CD4 T cells in non-stimulated control samples (medium) (Fig 2A). *P. yoelii* infection had a similar suppressive effect on the function of splenic CD8 T cells responding to

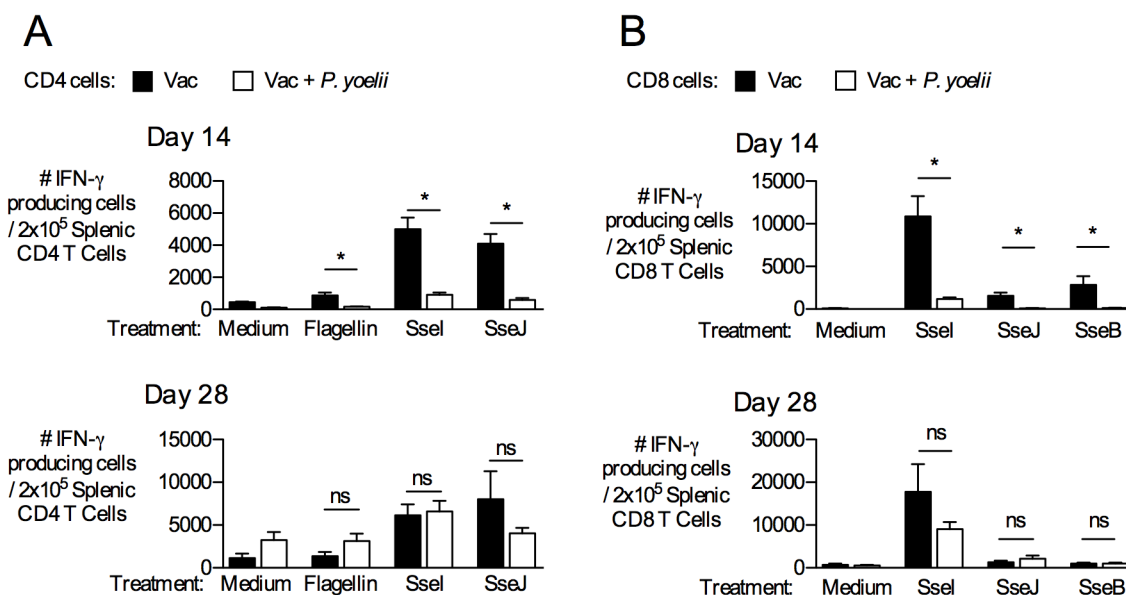

**Fig 2. IFN- $\gamma$ -producing capability of *Salmonella*-specific CD4 and CD8 T cells is reduced during peak malaria-parasite infection upon *ex vivo* stimulation.** C57BL/6 mice were vaccinated with *S. Typhimurium* BRD509 (Vac). On day 42, these mice were inoculated with *P. yoelii* as described above. (A) At either 14 d (top) or 28 d post-malaria parasite infection (bottom), CD4 T cells were enriched from spleens of *P. yoelii*-infected or control mice. CD4 T cells were restimulated with Flagellin, SseI, or SseJ peptides (Table 1) in the presence of irradiated naïve splenocytes, and IFN- $\gamma$  production was examined. Anti-CD3/anti-CD28 antibodies and no peptide (medium) wells constituted the positive and negative controls, respectively. Bar graphs show the number of IFN- $\gamma$ -producing CD4 T cells per  $2 \times 10^5$  CD4 T cells. (B) CD8 T cells were enriched from the spleens of the same mice, and stimulated with peptides corresponding to Class I epitopes from SseB, SseI and SseJ (Table 1). Data represent Mean+SEM of three independent experiments (n = 9). Significance of differences between groups was determined using a Student's *t* test (\*,  $p < 0.05$ ; ns, not significant).

doi:10.1371/journal.pntd.0004027.g002



newly-identified Class I epitopes of SseI, SseJ and SseB (Table 1 and Fig 2B), that was restored upon resolution of parasitemia at day 28. Together, these data show that malaria parasite infection temporarily inhibits the ability of *Salmonella*-specific CD4 and CD8 T cells to produce IFN- $\gamma$  upon re-encountering antigen.

Based on the more prominent role of CD4 T cells in adaptive immunity to *S. Typhimurium* in mouse models [32,33], we focused our attention on suppression of CD4 T cell memory during acute malaria. In order to directly enumerate antigen-specific CD4 T cells *in vivo*, mice were initially vaccinated with a live vaccine strain of *S. Typhimurium* expressing the MHC Class II epitope 2W1S (BRD509::2W1S, strain SPN555) and subsequently infected with *P. yoelii*. Using this approach, the effect of parasite infection on the frequency and function of 2W1S-specific CD4 T cells was determined using a 2W1S MHC class-II tetramer [34]. While the frequency of tetramer-positive CD4 T cells decreased in the liver, the absolute number of 2W1S-specific cells was actually higher during malaria infection (Fig 3A). This alteration was limited to the liver, since both the total number and frequency of 2W1S-specific CD4 T cells in spleen and lymph nodes (mesenteric and peripheral LN) was unchanged during active malaria infection (Figs 3A and S5). The reduced proportion (%) of 2W1S+ cells within the total T cell population during malaria may result from rapid influx of malaria-specific T cells in the liver. Conversely, the absolute counts showed that the 2W1S population was actually increasing in number. While the reason for the increase in absolute number of 2W1S cells in the liver is unclear, the local inflammatory response to the parasite in this location may result in local cytokine production (IL-2, IL-7, IL-15) that drives a small amount of expansion.

We also characterized the responsiveness of this population in *P. yoelii*-infected or control mice by *in vivo* restimulation with heat-killed *S. Typhimurium* BRD509::2W1S. In agreement with the *in vitro* analysis, a marked decrease in the proportion of IFN- $\gamma$ -producing cells was detected among CD44+ CD4 T cells, representing all CD4 T cells that have encountered antigen, as well as in the tetramer-positive 2W1S-specific CD4 T cell population (Fig 3B and 3C). In order to determine whether this reduction was specific to secondary stimulation with *S. Typhimurium* vaccine antigens, purified CD4 T cells from either BRD509::2W1S-vaccinated or BRD509::2W1S-vaccinated and *P. yoelii*-infected mice were stimulated *ex vivo* for 4 hours with the Protein Kinase C activator 12-O-Tetradecanoylphorbol-13-acetate (PMA) and the calcium ionophore ionomycin (iono). Again, we observed a decreased proportion of IFN- $\gamma$ -producing cells for both the total pool of antigen-experienced T cells (CD44+) (Fig 3D) and among all CD4 T cells (Fig 3E). Together, these data suggest that active malaria parasite infection reduces the ability of memory CD4 T cells to produce IFN- $\gamma$  in response to both stimulation via the T cell receptor (TCR) and to non-specific stimulation of TCR signaling pathways by PMA/iono treatment.

### Alteration in memory CD4 T cell phenotypes during malaria

Our previous work showed that in the context of primary *S. Typhimurium* infection, IL-10 produced by phagocytes during *P. yoelii* infection compromised the ability of co-infected mice to control disseminated *S. Typhimurium* infection [35]. We therefore determined whether IL-10 blockade would restore protection by the NTS vaccine. Mice were vaccinated and inoculated with *P. yoelii* as described above, then challenged with *S. Typhimurium* in the presence or absence of neutralizing antibodies to IL-10 (Fig 4). As described previously, *S. Typhimurium* challenge in the context of acute *P. yoelii* infection resulted in dampening of IFN- $\gamma$  and increase of IL-10 in the spleen of infected mice (Fig 4A). While IL-10 blockade reduced circulating parasite burden (Fig 4B), and decreased the burden of *S. Typhimurium* in the liver by one order of magnitude (Fig 4C), it did not restore the ability of CD4 T cells to produce IFN- $\gamma$  in response to *S. Typhimurium* infection (data not shown).

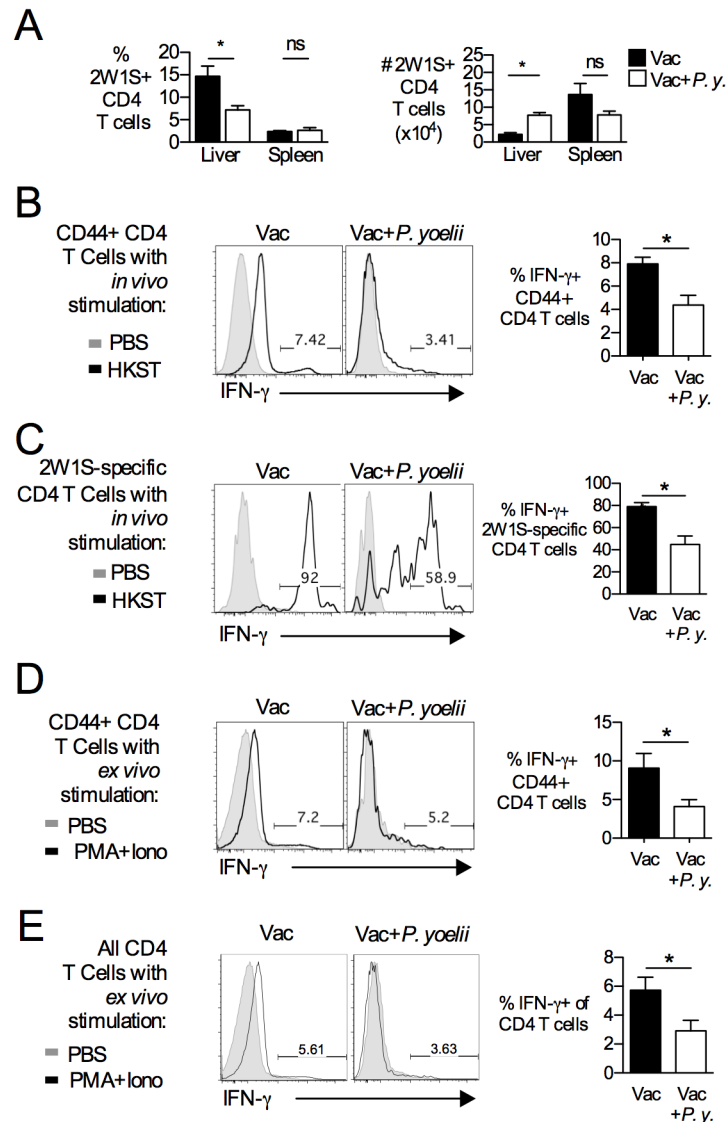

**Fig 3. IFN- $\gamma$ -producing capability of *Salmonella*-specific CD4 T cells is reduced during peak malaria-parasite infection.** Mice were vaccinated with *S. Typhimurium* BRD509::2W1S (Vac). On day 42, vaccinated mice were infected with *P. yoelii* (*P.y.*). At 14 days post-malaria parasite infection, cells were analyzed. **(A)** Spleens and livers were analyzed by flow cytometry. Using 2W1S::I-A<sup>b</sup> tetramer staining on CD4 T cells, we evaluated both the percentage (%) and absolute number (#) of 2W1S-specific CD4 T cell populations in the liver and spleen. Data are shown as Mean+SEM (n = 3–4). Representative dot plots are shown in S5 Fig. To simulate CD4 T cells *in vivo*, *P. yoelii*-infected or control mice were treated *i.v.* with heat-killed *S. Typhimurium* lysates (+ HKST) or PBS. After 4 hours, splenic CD44+ CD4 T cells **(B)** and 2W1S-specific CD4 T cells **(C)** were analyzed by flow cytometry for IFN- $\gamma$  production. Data represent Mean+SEM of three independent experiments (n = 9). To assess antigen-independent stimulation, splenic CD4 T cells were stimulated with PMA and Ionomycin (Iono) for 4 hours. IFN- $\gamma$  production was evaluated by flow cytometry for antigen-experienced (CD44+) **(D)** or all CD4 T cells **(E)**. Bars represent Mean+SEM (n = 3–4). Significance of differences between groups was determined using a Student's *t* test (\*, *p* < 0.05; ns, not significant).

doi:10.1371/journal.pntd.0004027.g003

Memory T cells can express inhibitory molecules that regulate effector function upon activation with cognate antigen [36]. Increased expression of inhibitory molecules, especially PD-1, CTLA4 and LAG3, has been associated with T cell exhaustion, a state of reduced effector function that arises during chronic infection [37]. Therefore, we determined the effect of acute

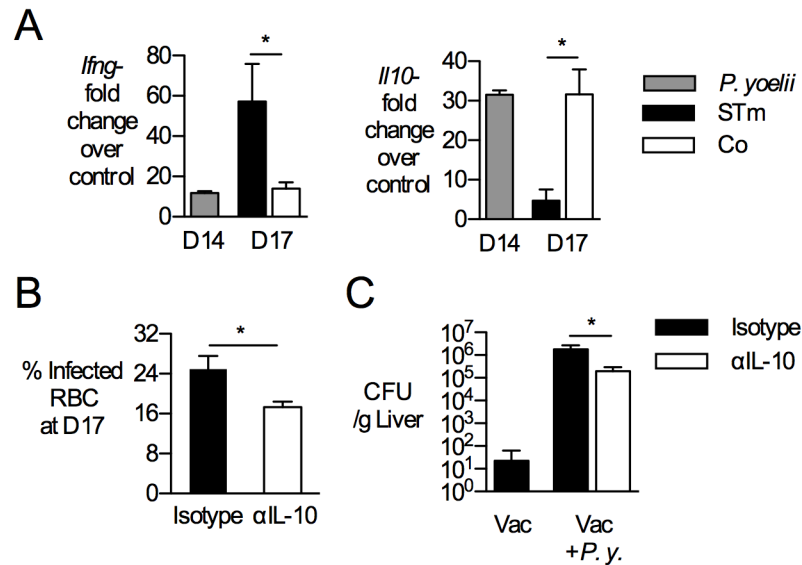

**Fig 4. *P. yoelii* infection increases IL-10 expression and IL-10 blockade partially restores protection.** C57BL/6 mice were vaccinated with *S. Typhimurium* BRD509::2W1S (Vac) and then given *P. yoelii* (*P.y.*) as described above. (A) Expression analysis of inflammatory markers by qRT-PCR at 14 d post malaria and 3 days post SL1344 challenge (D17). Transcript levels of interferon- $\gamma$  (*Ifng*) and interleukin-10 (*Il10*) were determined in whole spleen tissue, normalized to beta-actin levels and shown as fold-change over mock-treated mice. Bars indicate mean+SEM (n = 4). (B-C) IL-10 blockade was performed as described in methods. (B) Parasite burden, shown as % infected red blood cells (RBCs), was determined on Giemsa-stained blood smears from tails. (C). Antibody-treated mice were challenged with 750 CFU of virulent *S. Typhimurium* via the i.v. route at 14 days after *P. yoelii* infection. At 3 d post-challenge, bacterial burden was determined in livers and normalized to tissue weight. Data represent Mean+SEM (n = 4–5 per group). Significance of differences between groups was determined using a Student's *t* test (\*,  $p < 0.05$ ; ns, not significant).

doi:10.1371/journal.pntd.0004027.g004

malaria parasite infection on expression of inhibitory receptors by antigen-specific CD4 T cells in *S. Typhimurium*-vaccinated mice. At the peak of malaria infection, CD44+ 2W1S-tetramer-positive CD4 T cells demonstrated increased surface expression of PD-1, but not CTLA4 (Fig 5A). Since CD4 T cells are known to express multiple inhibitory molecules during infection with murine malaria parasites [38,39], we determined whether expression of inhibitory molecules was responsible for limiting the effector function of 2W1S-specific T cells after *S. Typhimurium* vaccination. To this end, we examined the effect of antibody blockade of CTLA-4, LAG3 and the PD-1 ligand PD-L1. As previously described [38,39], antibody blockade diminished circulating parasite levels (Fig 5B). Following *in vivo* stimulation with heat-killed *S. Typhimurium*, simultaneous blockade of CTLA-4, LAG3 and PD-L1 increased IFN- $\gamma$  production from 2W1S-specific CD4 T cells (Fig 5C). This result suggested that expression of inhibitory molecules could contribute to the observed erosion of vaccine-induced T cell memory during malaria. However, blockade of CTLA-4, LAG3 and PD-L1 was insufficient to restore control of *S. Typhimurium* infection (Fig 5D), suggesting that additional effects of malaria on immunity to *S. Typhimurium* may be responsible for loss of vaccine-mediated protection. Together, our results suggest that multiple effects of malaria parasite infection converge to compromise immunity to NTS induced by a live, attenuated vaccine.

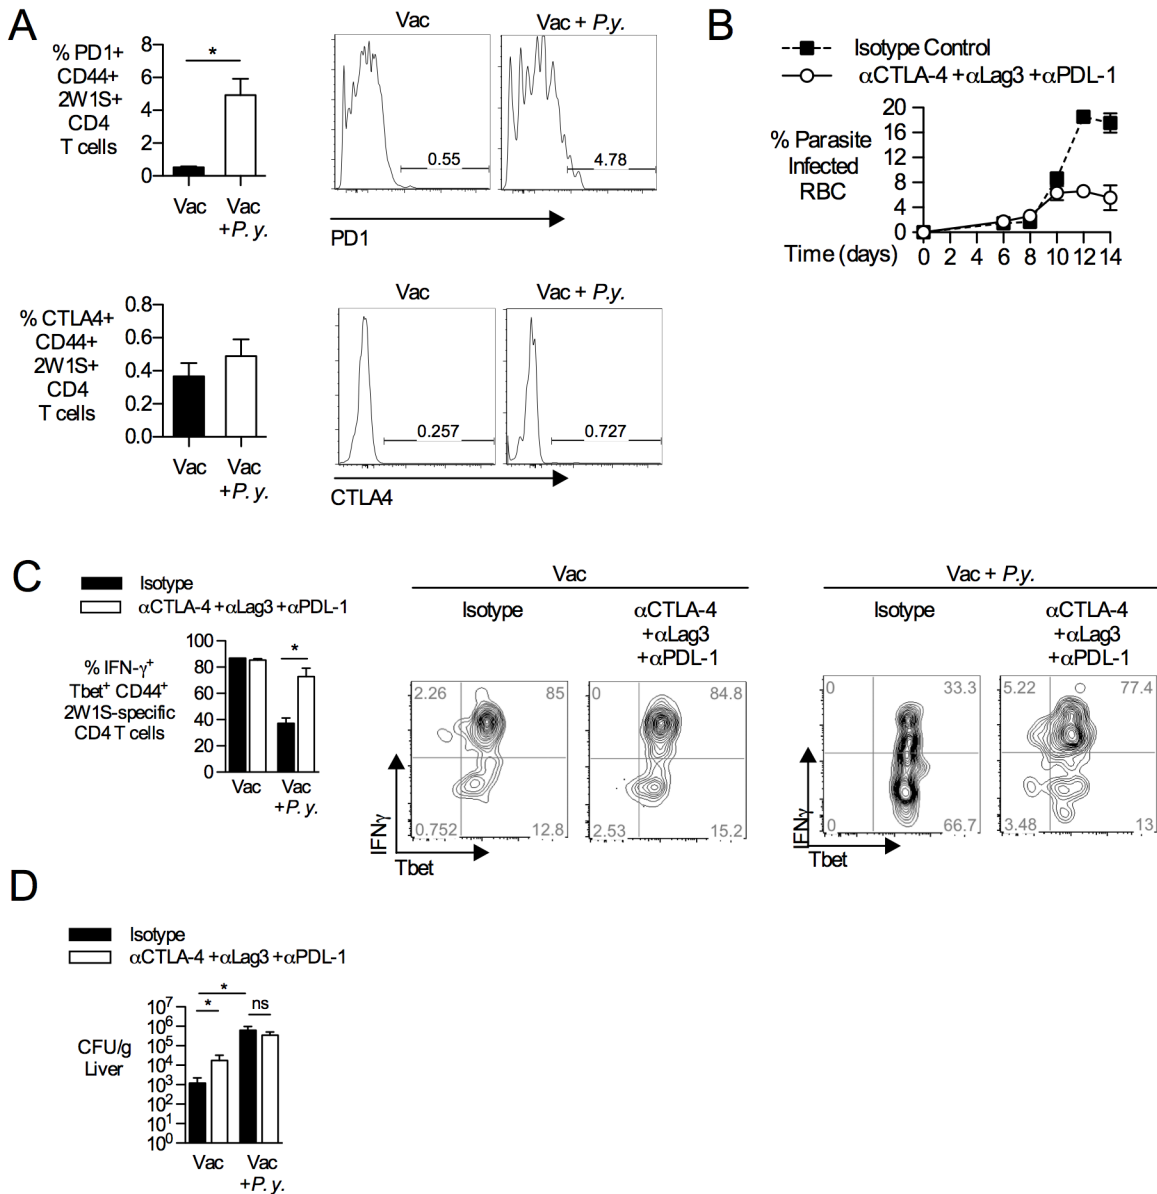

**Fig 5. *P. yoelii* infection increases PD1 expression on NTS-specific CD4 T cells.** C57BL/6 mice were vaccinated with *S. Typhimurium* BRD509:2W1S (Vac) and then given *P. yoelii* (*P. y.*) as described above. **(A)** At 14 d post *P. yoelii* infection, splenic T cells were evaluated by flow cytometry for expression of CTLA-4 and PD1. Bar graphs show percentage of CTLA-4+, and PD1+ among 2W1S-specific CD4 T cells. Data are shown as Mean+SEM (n = 10). **(B-D)** *P. yoelii*-infected mice were given either an antibody cocktail consisting of  $\alpha$ CTLA-4,  $\alpha$ LAG3 and  $\alpha$ PDL-1 or isotype control antibodies over 7 days as described in methods. **(B)** Parasite burden with blocking antibody cocktail (n = 3) or isotype control (n = 2), as determined by blood smears. **(C)** At 14 days post-*P. yoelii* infection, all the treated mice were injected i.v. with heat-killed *S. Typhimurium* lysates for 4 hours. Splenic CD4 T cells were analyzed by flow cytometry for IFN- $\gamma$  production. Bar graphs show percentage of IFN- $\gamma$  producing Tbet+ CD44+ 2W1S-specific CD4 T cells with blocking antibody cocktail (n = 3) or isotype control (n = 2). **(D)** Antibody-treated mice were challenged with 750 CFU of virulent *S. Typhimurium* via the i.v. route at 14 days after *P. yoelii* infection. At 3 d post-challenge, bacterial burden in livers and normalized to tissue weight. Data represent Mean+SEM (n = 5 per group). Data are shown as Mean+SEM. Significance of differences between groups was determined using a Student's *t* test (\*,  $p < 0.05$ ; ns, not significant).

doi:10.1371/journal.pntd.0004027.g005

## Discussion

Clinical studies suggest that natural adaptive immunity to NTS is widespread among children in Sub-Saharan Africa [40]. Here we show that during malaria infection, adaptive immunity to NTS infection conferred by previous exposure is temporarily interrupted. In mouse infection

models, adaptive immunity to *Salmonella* serovars is conferred by both antibody and T cells [27,40,41]. Malaria can cause apoptosis of memory B cells and long-lived plasma cells in mice [42–44], suggesting a potential effect on antibody responses. However, during the time frame of our study, which encompassed active and resolving malaria, circulating antibody levels induced by *S. Typhimurium* vaccination were maintained. Therefore, our studies with a live, attenuated vaccine do not permit any conclusions on the effect of malaria on immunity conferred by glycoconjugate vaccines, which elicit antibody-mediated immunity [12]. We observed that the loss in vaccine-induced protection in *P. yoelii*-infected mice correlated with increased IL-10 expression, as well as with the suppression of CD4 and CD8 T cell effector responses that are specific for *S. Typhimurium* antigens.

In contrast to what has been shown for B cells, memory CD4 T cells did not appear to undergo apoptosis during malaria, since absolute numbers of vaccine-induced, antigen-specific CD4 T cells were maintained at the peak of malaria parasite infection (Fig 3A). Nevertheless, antigen-specific memory CD4 T cells failed to respond to antigen by differentiating into IFN- $\gamma$ -producing effector cells. The refractory state of memory CD4 T cells did not result solely from previously described effects of malaria on DC function [45], as antigen-presenting cells isolated from *P. yoelii*-infected mice were able to prime vaccine-elicited memory CD4 T cells specific for the 2W1S epitope (data not shown). Furthermore, memory CD4 T cells from *P. yoelii*-infected mice were unable to respond *ex vivo* to *S. Typhimurium* Class II antigens flagellin, SseI and SseJ presented by naïve splenocytes, providing further evidence for a T cell-intrinsic defect in adaptive immunity during malaria (Fig 2). This intrinsic defect in IFN- $\gamma$ -production was observed with *in vivo* antigen challenge as well as *ex vivo* stimulation with PMA/iono (Fig 3B–3E). With increased surface expression of PD1 on memory CD4 T cells (Fig 5A), the phenotypic traits of *Salmonella* vaccine-induced memory T cells during malaria share characteristics of exhausted CD4 T cells identified during chronic viral infection [46]. This finding is consistent with previous reports of CD4 T cell dysfunction during malaria [38,47], which has been shown to have the beneficial effect of preventing immunopathology during acute infection [48,49]. Blockade of PDL-1, CTLA4 and LAG3 restored the ability of antigen-specific CD4 T cells to produce IFN- $\gamma$ , suggesting that in addition to its previously described effect on control of acute malaria [38], upregulation of inhibitory ligands contributes to dysfunction of memory CD4 T cells generated by vaccination. However, this effect alone is insufficient to explain loss of vaccine-induced immunity (Fig 5D). Since IL-10 blockade partially restored protection against NTS in the context of concurrent *P. yoelii* infection (Fig 4C), it is likely that the suppressive effect of IL-10 on macrophage bactericidal function is a contributing factor to loss of immunity, similar to what we have reported previously in the context of primary *S. Typhimurium* infection [35]. It is interesting to note in this context that both IL-10 blockade and blockade of PDL-1, CTLA4 and LAG3 reduced the level of circulating malaria parasites, however only IL-10 blockade restored vaccine-mediated protection. Thus, while reduction of parasitemia may have contributed to the improved control of *S. Typhimurium* after IL-10 blockade, it may not be sufficient on its own to restore immune responses during the acute phase of infection.

During acute malaria, it is likely that a defect in memory CD4 T cell effector function acts together with other malaria-induced defects in innate immunity to compromise established adaptive immunity acquired either by vaccination or from previous infections. These include reduced MHCII expression [45,50,51], altered macrophage polarization [35], neutrophil dysfunction [52] and depletion of complement [53]. Further, in agreement with our results (Fig 2) a loss of memory CD8 T cells induced by both bacterial and viral infections was observed in a co-infection model [54]. Given these numerous effects of malaria on innate and adaptive immunity, it is possible that interventions to restore adaptive immune function may fail to

compensate for the effects of malaria parasite infection on macrophages and neutrophils that are critical to control of NTS infection.

Some limitations of our study design should be taken into consideration when extrapolating our results to vaccination of children with malaria. We do not know the mechanism by which malaria parasite infection suppressed memory T cell responses in our animal model, and additional studies will be required to define the precise defects. Further, in order to assay antigen-specific Th1 cell responses, we utilized parenteral routes of infection and some of our assays used stimulation of T cells with antigen *ex vivo* under conditions that may not precisely mimic those encountered in the host environment. In addition, our murine malaria model utilizing *P. yoelii* infection has some differences to *P. falciparum* malaria that is widespread in Africa, including higher levels of circulating parasites, and there may be differences in responses of mice and humans to malaria parasite infection. Also, since live attenuated vaccines, but not polysaccharide conjugate vaccines depend on cellular immunity, the loss of T cell-based immunity would not be expected to affect responses to glycoconjugate vaccines. For these reasons, clinical studies would be needed to assess whether loss of cellular immune responses to *S. Typhimurium* occurs in children with malaria and whether this loss of T cell immunity extends to vaccines against other intracellular pathogens, which would be suggestive of global suppression of T cell function by malaria.

Taken together, our results with an animal model suggest that multiple effects of malaria on the immune system can compromise established adaptive immunity to a live, attenuated *S. Typhimurium* vaccine during the acute phase of malaria. If a similar loss of adaptive immune responses is found to occur in children with malaria, it would suggest that malaria eradication efforts may have the added benefit of increasing vaccine-mediated protection against disseminated non-typhoidal *Salmonella* infection.

## Supporting Information

### S1 Fig. Effect of *P. yoelii* infection on spleen size, anemia and circulating lymphocytes.

Relating to [Fig 1](#), C57BL/6 mice were infected with  $4 \times 10^7$  infected red blood cells (RBC) of *P. yoelii* by the i.p. route, and the rest given control blood. (A) Picture and weights ( $n = 4$ ) of spleens taken from *P. yoelii*-infected or control mice at 14 and 28 days post-infection. (B) Bar graphs represent data from complete blood counts taken from blood obtained through cardiac puncture at either 14 or 28 days post malaria parasite infection ( $n = 4$ ). (C) Sub-patent malaria infection was determined by transfer of 0.2mL of whole blood from mice at 28 days post-*P. yoelii* infection into naïve mice ( $n = 4$ ). Parasite burden was monitored by blood smears at 2, 5, and 12 days post transfer but no parasites were detected (ND, not detected). Data represents Mean+SEM. Significance of differences between groups was determined using a Student's *t* test (\*,  $p < 0.05$ ; ns, not significant). (TIFF)

**S2 Fig. Effect of malaria parasite infection on systemic bacterial burden in *S. Typhimurium*-vaccinated mice after challenge with virulent *S. Typhimurium*.** Relating to [Fig 1](#), C57BL/6 mice were vaccinated i.v. with  $5 \times 10^5$  attenuated *S. Typhimurium* BRD509. 42 days later, a group of vaccinated mice was infected with  $4 \times 10^7$  infected red blood cells (RBC) containing *P. yoelii* by the i.p. route, and the rest given control blood. Bacterial burden in the spleens of mice challenged with virulent *S. Typhimurium* at either 14 days (A) or 28 days (B) post *P. yoelii* infection ( $n = 4-8$ ). (C) C57BL/6 ( $n = 5$ ), which are *Nramp1/Slc11a1*<sup>-/-</sup>, or C57BL/6 expressing a functional allele of *Slc11a1* ( $n = 3-13$ ), were vaccinated, then inoculated with *P. yoelii* and challenged i.v. with virulent *S. Typhimurium* at 14 days after *P. yoelii* infection. *S. Typhimurium* burden was quantified in the spleen (top) and blood (bottom) at 3 days after

challenge with virulent *S. Typhimurium*. ND, not detected. X, not performed. Data are shown as Mean+SEM. Significance of differences between groups was determined using a Student's *t* test (\*,  $p < 0.05$ ; ns, not significant).

(TIFF)

**S3 Fig. Systemic bacterial burden in CBA/J mice vaccinated against *S. Typhimurium*, infected with malaria and then challenged intragastrically with virulent *S. Typhimurium*.**

Relating to Fig 1, CBA/J mice were vaccinated i.v. with  $5 \times 10^5$  CFU of attenuated *S. Typhimurium* BRD509. 42 days later, a group of vaccinated mice was infected with  $4 \times 10^7$  infected red blood cells (RBC) of the non-lethal murine malaria parasite *P. yoelii* by the i.p. route, and the rest given control blood. (A) Parasite burden, shown as % infected red blood cells (RBC), was determined from Giemsa-stained blood smears ( $n = 4$ ). (B) Circulating red blood cells at 14 days post-*P. yoelii* infection in CBA/J mice was determined by manual counting ( $n = 7$ ). (C) Bacterial burden in the liver (left panel) and spleen (right panel) was determined 4 days after i.g. challenge with  $1 \times 10^8$  CFU of virulent *S. Typhimurium* ( $n = 6-7$ ). Data are shown as Mean+SEM. Significance of differences between groups was determined using a Student's *t* test (\*,  $p < 0.05$ ; ns, not significant).

(TIFF)

**S4 Fig. Circulating IgG2c and IgM to *Salmonella* remains during malaria-parasite infection.** C57BL/6 mice were vaccinated with *Salmonella* BRD509 and on day 42, these mice were inoculated with *P. yoelii* as described previously. At either 14 days (top) or 28 days (bottom) post-*P. yoelii* infection, levels of circulating *Salmonella*-specific IgG2c (A) or IgM (B) was determined by antibody ELISA through serial dilution of serum bound to plates coated with heat-killed *Salmonella*. Data are shown as Mean±SEM ( $n = 3-4$ ).

(TIFF)

**S5 Fig. Similar numbers of IFN- $\gamma$  producing, *Salmonella*-specific CD4 T cells recovered from lymph nodes.** Relating to Fig 3, C57BL/6 mice were vaccinated i.v. with  $5 \times 10^5$  CFU attenuated *S. Typhimurium* BRD509-2W1S. 42 days later, groups of vaccinated mice were inoculated i.p. with either  $4 \times 10^7$  *P. yoelii*-infected RBC or with control blood. (A) Representative dot plots relating to graphs in Fig 3A. Plots are 2W1S-CD4 T cells from the liver and spleen shown as a percent of total CD4 T cells. (B) CD4 T cells from mesenteric lymph nodes (MesLN) and peripheral lymph nodes (pLNs) were analyzed by flow cytometry. Using 2W1S::I-A<sup>b</sup> tetramer staining on CD4 T cells, we evaluated both the percentage (%) and absolute number (#) of 2W1S-specific CD4 T cell population in MesLN and pLNs. Bar represents Mean+SEM ( $n = 3-4$ ). Significance of differences between groups was determined using a Student's *t* test (\*,  $p < 0.05$ ; ns, not significant).

(TIFF)

## Acknowledgments

We gratefully acknowledge Briana Young, Kevin Nguyen and Trong Nguyen for technical assistance, and Shirley Luckhart for critical discussions of this work.

## Author Contributions

Conceived and designed the experiments: JPM SJL SJM RMT. Performed the experiments: JPM SJL KLL MRN SPN. Analyzed the data: JPM SJL. Contributed reagents/materials/analysis tools: SPN. Wrote the paper: JPM SJL KLL SJM RMT.

## References

1. Santos RL, Raffatellu M, Bevins CL, Adams LG, Tukel C, et al. (2009) Life in the inflamed intestine, *Salmonella* style. *Trends Microbiol* 17: 498–506. doi: [10.1016/j.tim.2009.08.008](https://doi.org/10.1016/j.tim.2009.08.008) PMID: [19819699](https://pubmed.ncbi.nlm.nih.gov/19819699/)
2. Mead PS, Slutsker L, Dietz V, McCaig LF, Bresee JS, et al. (1999) Food-related illness and death in the United States. *Emerg Infect Dis* 5: 607–625. PMID: [10511517](https://pubmed.ncbi.nlm.nih.gov/10511517/)
3. Majowicz SE, Musto J, Scallan E, Angulo FJ, Kirk M, et al. (2010) The global burden of nontyphoidal *Salmonella* gastroenteritis. *Clin Infect Dis* 50: 882–889. doi: [10.1086/650733](https://doi.org/10.1086/650733) PMID: [20158401](https://pubmed.ncbi.nlm.nih.gov/20158401/)
4. Bronzan RN, Taylor TE, Mwenechanya J, Tembo M, Kayira K, et al. (2007) Bacteremia in Malawian children with severe malaria: prevalence, etiology, HIV coinfection, and outcome. *J Infect Dis*. pp. 895–904.
5. Nielsen MV, Sarpong N, Krumkamp R, Dekker D, Loag W, et al. (2012) Incidence and characteristics of bacteremia among children in rural Ghana. *PLoS One* 7: e44063. doi: [10.1371/journal.pone.0044063](https://doi.org/10.1371/journal.pone.0044063) PMID: [22970162](https://pubmed.ncbi.nlm.nih.gov/22970162/)
6. Reddy EA, Shaw AV, Crump JA (2010) Community-acquired bloodstream infections in Africa: a systematic review and meta-analysis. *The Lancet Infectious Diseases*. pp. 417–432. doi: [10.1016/S1473-3099\(10\)70072-4](https://doi.org/10.1016/S1473-3099(10)70072-4) PMID: [20510282](https://pubmed.ncbi.nlm.nih.gov/20510282/)
7. Sigauque B, Roca A, Mandomando I, Morais L, Quintó L, et al. (2009) Community-Acquired Bacteremia Among Children Admitted to a Rural Hospital in Mozambique. *Pediatr Infect Dis J*. pp. 108–113. doi: [10.1097/INF.0b013e318187a87d](https://doi.org/10.1097/INF.0b013e318187a87d) PMID: [19131902](https://pubmed.ncbi.nlm.nih.gov/19131902/)
8. Enwere G, Biney E, Cheung YB, Zaman SM, Okoko B, et al. (2006) Epidemiologic and clinical characteristics of community-acquired invasive bacterial infections in children aged 2–29 months in The Gambia. *Pediatr Infect Dis J* 25: 700–705. PMID: [16874169](https://pubmed.ncbi.nlm.nih.gov/16874169/)
9. MacLennan CA, Levine MM (2013) Invasive nontyphoidal *Salmonella* disease in Africa: current status. *Expert Rev Anti Infect Ther* 11: 443–446. doi: [10.1586/eri.13.27](https://doi.org/10.1586/eri.13.27) PMID: [23627848](https://pubmed.ncbi.nlm.nih.gov/23627848/)
10. Feasey NA, Cain AK, Msefula CL, Pickard D, Alaerts M, et al. (2014) Drug resistance in *Salmonella enterica* ser. Typhimurium bloodstream infection, Malawi. *Emerg Infect Dis* 20: 1957–1959. doi: [10.3201/eid2011.141175](https://doi.org/10.3201/eid2011.141175) PMID: [25340988](https://pubmed.ncbi.nlm.nih.gov/25340988/)
11. Kingsley RA, Msefula CL, Thomson NR, Kariuki S, Holt KE, et al. (2009) Epidemic multiple drug resistant *Salmonella* Typhimurium causing invasive disease in sub-Saharan Africa have a distinct genotype. *Genome Research*. pp. 2279–2287. doi: [10.1101/gr.091017.109](https://doi.org/10.1101/gr.091017.109) PMID: [19901036](https://pubmed.ncbi.nlm.nih.gov/19901036/)
12. MacLennan CA, Martin LB, Micoli F (2014) Vaccines against invasive *Salmonella* disease: current status and future directions. *Hum Vaccin Immunother* 10: 1478–1493. doi: [10.4161/hv.29054](https://doi.org/10.4161/hv.29054) PMID: [24804797](https://pubmed.ncbi.nlm.nih.gov/24804797/)
13. Chatfield SN, Charles IG, Makoff AJ, Oxe MD, Dougan G, et al. (1992) Use of the *nirB* promoter to direct the stable expression of heterologous antigens in *Salmonella* oral vaccine strains: development of a single-dose oral tetanus vaccine. *Biotechnology (N Y)* 10: 888–892.
14. Maniatis T, Fritsch EF, Sambrook J (1982) *Molecular cloning: a laboratory manual*. Cold Spring Harbor, N.Y.: Cold Spring Harbor Laboratory. x, 545 p. p.
15. Bochner BR (1984) Curing bacterial cells of lysogenic viruses by using UCB indicator plates. *BioTechniques* 2: 234–240.
16. Nelson RW, McLachlan JB, Kurtz JR, Jenkins MK (2013) CD4+ T cell persistence and function after infection are maintained by low-level peptide:MHC class II presentation. *J Immunol* 190: 2828–2834. doi: [10.4049/jimmunol.1202183](https://doi.org/10.4049/jimmunol.1202183) PMID: [23382562](https://pubmed.ncbi.nlm.nih.gov/23382562/)
17. Moon JJ, Chu HH, Hataye J, Pagan AJ, Pepper M, et al. (2009) Tracking epitope-specific T cells. *Nat Protoc* 4: 565–581. doi: [10.1038/nprot.2009.9](https://doi.org/10.1038/nprot.2009.9) PMID: [19373228](https://pubmed.ncbi.nlm.nih.gov/19373228/)
18. Lee SJ, Liang L, Juarez S, Nanton MR, Gondwe EN, et al. (2012) Identification of a common immune signature in murine and human systemic *Salmonellosis*. *Proc Natl Acad Sci U S A* 109: 4998–5003. doi: [10.1073/pnas.1111413109](https://doi.org/10.1073/pnas.1111413109) PMID: [22331879](https://pubmed.ncbi.nlm.nih.gov/22331879/)
19. McSorley SJ, Cookson BT, Jenkins MK (2000) Characterization of CD4+ T cell responses during natural infection with *Salmonella typhimurium*. *J Immunol* 164: 986–993. PMID: [10623848](https://pubmed.ncbi.nlm.nih.gov/10623848/)
20. Rees W, Bender J, Teague TK, Kedl RM, Crawford F, et al. (1999) An inverse relationship between T cell receptor affinity and antigen dose during CD4(+) T cell responses in vivo and in vitro. *Proc Natl Acad Sci U S A* 96: 9781–9786. PMID: [10449771](https://pubmed.ncbi.nlm.nih.gov/10449771/)
21. Roux CM, Rolan HG, Santos RL, Beremand PD, Thomas TL, et al. (2007) *Brucella* requires a functional Type IV secretion system to elicit innate immune responses in mice. *Cell Microbiol* 9: 1851–1869. PMID: [17441987](https://pubmed.ncbi.nlm.nih.gov/17441987/)
22. Church J, Maitland K (2014) Invasive bacterial co-infection in African children with *Plasmodium falciparum* malaria: a systematic review. *BMC Med* 12: 31. doi: [10.1186/1741-7015-12-31](https://doi.org/10.1186/1741-7015-12-31) PMID: [24548672](https://pubmed.ncbi.nlm.nih.gov/24548672/)



23. Cunnington AJ, Riley EM (2010) Suppression of vaccine responses by malaria: insignificant or overlooked? *Expert Rev Vaccines* 9: 409–429. doi: [10.1586/erv.10.16](https://doi.org/10.1586/erv.10.16) PMID: [20370551](https://pubmed.ncbi.nlm.nih.gov/20370551/)
24. Allen JS, Dougan G, Strugnell RA (2000) Kinetics of the mucosal antibody secreting cell response and evidence of specific lymphocyte migration to the lung after oral immunisation with attenuated *S. enterica* var. typhimurium. *FEMS Immunol Med Microbiol* 27: 275–281. PMID: [10727882](https://pubmed.ncbi.nlm.nih.gov/10727882/)
25. Hoiseith SK, Stocker BA (1981) Aromatic-dependent *Salmonella typhimurium* are non-virulent and effective as live vaccines. *Nature* 291: 238–239. PMID: [7015147](https://pubmed.ncbi.nlm.nih.gov/7015147/)
26. Karem KL, Chatfield S, Kuklin N, Rouse BT (1995) Differential induction of carrier antigen-specific immunity by *Salmonella typhimurium* live-vaccine strains after single mucosal or intravenous immunization of BALB/c mice. *Infect Immun* 63: 4557–4563. PMID: [7591105](https://pubmed.ncbi.nlm.nih.gov/7591105/)
27. McSorley SJ (2014) Immunity to intestinal pathogens: lessons learned from *Salmonella*. *Immunol Rev* 260: 168–182. doi: [10.1111/imr.12184](https://doi.org/10.1111/imr.12184) PMID: [24942689](https://pubmed.ncbi.nlm.nih.gov/24942689/)
28. Soo SS, Villarreal-Ramos B, Anjam Khan CM, Hormaeche CE, Blackwell JM (1998) Genetic control of immune response to recombinant antigens carried by an attenuated *Salmonella typhimurium* vaccine strain: Nramp1 influences T-helper subset responses and protection against leishmanial challenge. *Infect Immun* 66: 1910–1917. PMID: [9573069](https://pubmed.ncbi.nlm.nih.gov/9573069/)
29. Mastroeni P, Simmons C, Fowler R, Hormaeche CE, Dougan G (2000) Igh-6(-/-) (B-cell-deficient) mice fail to mount solid acquired resistance to oral challenge with virulent *Salmonella enterica* serovar typhimurium and show impaired Th1 T-cell responses to *Salmonella* antigens. *Infect Immun* 68: 46–53. PMID: [10603367](https://pubmed.ncbi.nlm.nih.gov/10603367/)
30. Cunningham AF, Gaspal F, Serre K, Mohr E, Henderson IR, et al. (2007) *Salmonella* induces a switched antibody response without germinal centers that impedes the extracellular spread of infection. *J Immunol* 178: 6200–6207. PMID: [17475847](https://pubmed.ncbi.nlm.nih.gov/17475847/)
31. Moon JJ, McSorley SJ (2009) Tracking the dynamics of salmonella specific T cell responses. *Curr Top Microbiol Immunol* 334: 179–198. doi: [10.1007/978-3-540-93864-4\\_8](https://doi.org/10.1007/978-3-540-93864-4_8) PMID: [19521686](https://pubmed.ncbi.nlm.nih.gov/19521686/)
32. Mastroeni P, Villarreal-Ramos B, Hormaeche CE (1992) Role of T cells, TNF alpha and IFN gamma in recall of immunity to oral challenge with virulent salmonellae in mice vaccinated with live attenuated aro- *Salmonella* vaccines. *Microb Pathog* 13: 477–491. PMID: [1363824](https://pubmed.ncbi.nlm.nih.gov/1363824/)
33. Nauciel C (1990) Role of CD4+ T cells and T-independent mechanisms in acquired resistance to *Salmonella typhimurium* infection. *J Immunol* 145: 1265–1269. PMID: [1974274](https://pubmed.ncbi.nlm.nih.gov/1974274/)
34. Pepper M, Linehan JL, Pagan AJ, Zell T, Dileepan T, et al. (2010) Different routes of bacterial infection induce long-lived TH1 memory cells and short-lived TH17 cells. *Nat Immunol* 11: 83–89. doi: [10.1038/ni.1826](https://doi.org/10.1038/ni.1826) PMID: [19935657](https://pubmed.ncbi.nlm.nih.gov/19935657/)
35. Lokken KL, Mooney JP, Butler BP, Xavier MN, Chau JY, et al. (2014) Malaria parasite infection compromises control of concurrent systemic non-typhoidal *Salmonella* infection via IL-10-mediated alteration of myeloid cell function. *PLoS Pathog* 10: e1004049. doi: [10.1371/journal.ppat.1004049](https://doi.org/10.1371/journal.ppat.1004049) PMID: [24787713](https://pubmed.ncbi.nlm.nih.gov/24787713/)
36. Chen L, Flies DB (2013) Molecular mechanisms of T cell co-stimulation and co-inhibition. *Nat Rev Immunol* 13: 227–242. doi: [10.1038/nri3405](https://doi.org/10.1038/nri3405) PMID: [23470321](https://pubmed.ncbi.nlm.nih.gov/23470321/)
37. Wherry EJ (2011) T cell exhaustion. *Nat Immunol* 12: 492–499. PMID: [21739672](https://pubmed.ncbi.nlm.nih.gov/21739672/)
38. Butler NS, Moebius J, Pewe LL, Traore B, Doumbo OK, et al. (2012) Therapeutic blockade of PD-L1 and LAG-3 rapidly clears established blood-stage Plasmodium infection. *Nat Immunol* 13: 188–195.
39. Lepenies B, Gaworski I, Tartz S, Langhorne J, Fleischer B, et al. (2007) CTLA-4 blockade differentially influences the outcome of non-lethal and lethal Plasmodium yoelii infections. *Microbes Infect* 9: 687–694. PMID: [17398134](https://pubmed.ncbi.nlm.nih.gov/17398134/)
40. MacLennan CA, Gondwe EN, Msefula CL, Kingsley RA, Thomson NR, et al. (2008) The neglected role of antibody in protection against bacteremia caused by nontyphoidal strains of *Salmonella* in African children. *J Clin Invest*. pp. 1553–1562. doi: [10.1172/JCI33998](https://doi.org/10.1172/JCI33998) PMID: [18357343](https://pubmed.ncbi.nlm.nih.gov/18357343/)
41. Mastroeni P, Villarreal-Ramos B, Hormaeche CE (1993) Adoptive transfer of immunity to oral challenge with virulent salmonellae in innately susceptible BALB/c mice requires both immune serum and T cells. *Infect Immun* 61: 3981–3984. PMID: [8359920](https://pubmed.ncbi.nlm.nih.gov/8359920/)
42. Ng DH, Skehel JJ, Kassiotis G, Langhorne J (2014) Recovery of an antiviral antibody response following attrition caused by unrelated infection. *PLoS Pathog* 10: e1003843. doi: [10.1371/journal.ppat.1003843](https://doi.org/10.1371/journal.ppat.1003843) PMID: [24391499](https://pubmed.ncbi.nlm.nih.gov/24391499/)
43. Wykes MN, Zhou YH, Liu XQ, Good MF (2005) Plasmodium yoelii can ablate vaccine-induced long-term protection in mice. *J Immunol* 175: 2510–2516. PMID: [16081823](https://pubmed.ncbi.nlm.nih.gov/16081823/)
44. Banga S, Coursen JD, Portugal S, Tran TM, Hancox L, et al. (2015) Impact of acute malaria on pre-existing antibodies to viral and vaccine antigens in mice and humans. *PLoS One* 10: e0125090. doi: [10.1371/journal.pone.0125090](https://doi.org/10.1371/journal.pone.0125090) PMID: [25919588](https://pubmed.ncbi.nlm.nih.gov/25919588/)

45. Lundie RJ, Young LJ, Davey GM, Villadangos JA, Carbone FR, et al. (2010) Blood-stage *Plasmodium berghei* infection leads to short-lived parasite-associated antigen presentation by dendritic cells. *Eur J Immunol* 40: 1674–1681. doi: [10.1002/eji.200939265](https://doi.org/10.1002/eji.200939265) PMID: [20391433](https://pubmed.ncbi.nlm.nih.gov/20391433/)
46. Crawford A, Angelosanto JM, Kao C, Doering TA, Odorizzi PM, et al. (2014) Molecular and transcriptional basis of CD4(+) T cell dysfunction during chronic infection. *Immunity* 40: 289–302. doi: [10.1016/j.immuni.2014.01.005](https://doi.org/10.1016/j.immuni.2014.01.005) PMID: [24530057](https://pubmed.ncbi.nlm.nih.gov/24530057/)
47. Illingworth J, Butler NS, Roetynck S, Mwacharo J, Pierce SK, et al. (2013) Chronic exposure to *Plasmodium falciparum* is associated with phenotypic evidence of B and T cell exhaustion. *J Immunol* 190: 1038–1047. doi: [10.4049/jimmunol.1202438](https://doi.org/10.4049/jimmunol.1202438) PMID: [23264654](https://pubmed.ncbi.nlm.nih.gov/23264654/)
48. Hafalla JC, Claser C, Couper KN, Grau GE, Renia L, et al. (2012) The CTLA-4 and PD-1/PD-L1 inhibitory pathways independently regulate host resistance to *Plasmodium*-induced acute immune pathology. *PLoS Pathog* 8: e1002504. doi: [10.1371/journal.ppat.1002504](https://doi.org/10.1371/journal.ppat.1002504) PMID: [22319445](https://pubmed.ncbi.nlm.nih.gov/22319445/)
49. Haque A, Best SE, Amante FH, Mustafah S, Desbarrieres L, et al. (2010) CD4+ natural regulatory T cells prevent experimental cerebral malaria via CTLA-4 when expanded in vivo. *PLoS Pathog* 6: e1001221. doi: [10.1371/journal.ppat.1001221](https://doi.org/10.1371/journal.ppat.1001221) PMID: [21170302](https://pubmed.ncbi.nlm.nih.gov/21170302/)
50. Pinzon-Charry A, Woodberry T, Kienzle V, McPhun V, Minigo G, et al. (2013) Apoptosis and dysfunction of blood dendritic cells in patients with falciparum and vivax malaria. *J Exp Med* 210: 1635–1646. doi: [10.1084/jem.20121972](https://doi.org/10.1084/jem.20121972) PMID: [23835848](https://pubmed.ncbi.nlm.nih.gov/23835848/)
51. Urban BC, Ferguson DJ, Pain A, Willcox N, Plebanski M, et al. (1999) *Plasmodium falciparum*-infected erythrocytes modulate the maturation of dendritic cells. *Nature* 400: 73–77. PMID: [10403251](https://pubmed.ncbi.nlm.nih.gov/10403251/)
52. Cunningham AJ, de Souza JB, Walther M, Riley EM (2012) Malaria impairs resistance to *Salmonella* through heme- and heme oxygenase-dependent dysfunctional granulocyte mobilization. *Nature Medicine*. pp. 120–127.
53. Nyakoe NK, Taylor RP, Makumi JN, Waitumbi JN (2009) Complement consumption in children with *Plasmodium falciparum* malaria. *Malar J* 8: 7. doi: [10.1186/1475-2875-8-7](https://doi.org/10.1186/1475-2875-8-7) PMID: [19134190](https://pubmed.ncbi.nlm.nih.gov/19134190/)
54. White CE, Villarino NF, Sloan SS, Ganusov VV, Schmidt NW (2015) *Plasmodium* suppresses expansion of T cell responses to heterologous infections. *J Immunol* 194: 697–708. doi: [10.4049/jimmunol.1401745](https://doi.org/10.4049/jimmunol.1401745) PMID: [25505280](https://pubmed.ncbi.nlm.nih.gov/25505280/)
